# Supplementary material for: Iron(ii), manganese(ii) and cobalt(ii) complexes containing tetradentate biphenyl-bridged ligands and their application in alkane oxidation catalysis
Source: Royal Society of Chemistry journal article supplement (doi:10.1039/b513886h), 2006-01-01
Supplement: b513886h.pdf [file b513886h.pdf]

## Supplementary Data — X-Ray Crystallography

**Manuscript:** Synthesis of Iron(II), Manganese(II) and Cobalt(II) Complexes  
Containing Tetradentate Nitrogen Ligands and their Application in the  
Catalytic Oxidation of Alkanes

**Authors:** George J.P. Britovsek, Jason England and Andrew J.P. White

**Fig. S1** The molecular structure of the  $C_2$  symmetric complex  $\text{Fe}(\mathbf{1})\text{OTf}_2$  (30% probability ellipsoids).

**Fig. S2** The molecular structure of  $\text{Fe}(\mathbf{1})\text{OTf}_2$  showing the *ca.* 90:10 disorder in the  $\text{OTf}_2$  ligands (the dashed bonds indicate the minor occupancy 10% orientation).

**Fig. S3** The molecular structure of  $\text{Fe}(\mathbf{9})\text{OTf}_2$  (30% probability ellipsoids).

**Fig. S4** The molecular structure of  $\text{Fe}(\mathbf{9})\text{OTf}_2$  showing the *ca.* 80:20 and 90:10 disorder in the upper and lower  $\text{OTf}_2$  ligands respectively (the dashed bonds indicate the minor occupancy orientations).

**Fig. S5** The  $^1\text{H}$ -NMR spectrum and corresponding peak assignment for  $[\text{Fe}(\mathbf{1})(\text{OTf})_2]$ , recorded in  $\text{CD}_2\text{Cl}_2$  solution at 298 K.

**Fig. S6** The COSY  $^1\text{H}$ -NMR spectrum of  $[\text{Fe}(\mathbf{1})(\text{OTf})_2]$  in  $\text{CD}_2\text{Cl}_2$ .

**Fig. S7** The  $^1\text{H}$ -NMR spectrum and corresponding peak assignment for  $[\text{Fe}(\mathbf{7})(\text{OTf})_2]$  recorded in  $\text{CDCl}_3$  solution at 298 K.

**Fig. S8** The  $^1\text{H}$ -NMR COSY spectrum and corresponding peak assignment for  $[\text{Fe}(\mathbf{8})(\text{OTf})_2]$  recorded in  $\text{CD}_3\text{CN}$  solution at 298 K.

**Fig. S9** The  $^1\text{H}$ -NMR spectrum and corresponding peak assignment for  $[\text{Fe}(\mathbf{12})(\text{OTf})_2]$ , recorded in  $\text{CDCl}_3$  solution at 298 K.

**Fig. S10** UV-VIS spectra of biphenyl-bridged bis(pyridylmethyl) diamine iron(II) complexes. (Solvent: acetonitrile,  $c = 0.5 \text{ mM}$ ).

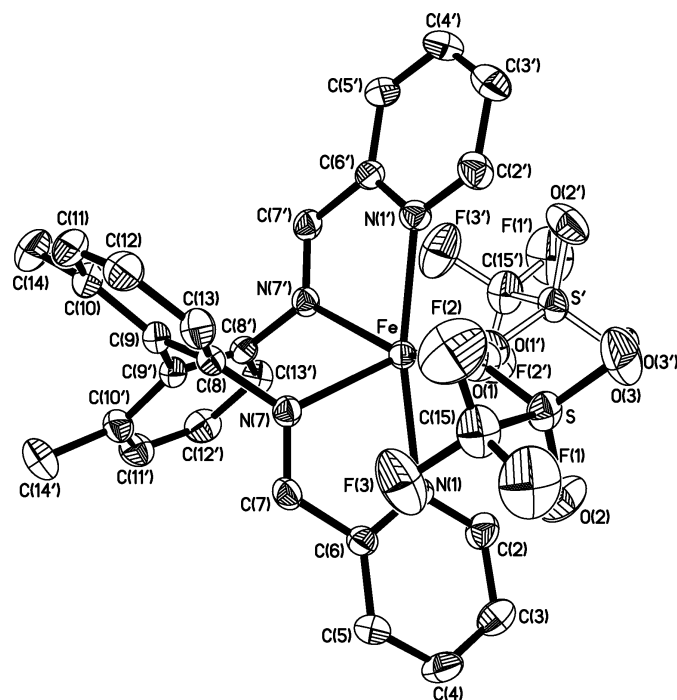

Fig. S1

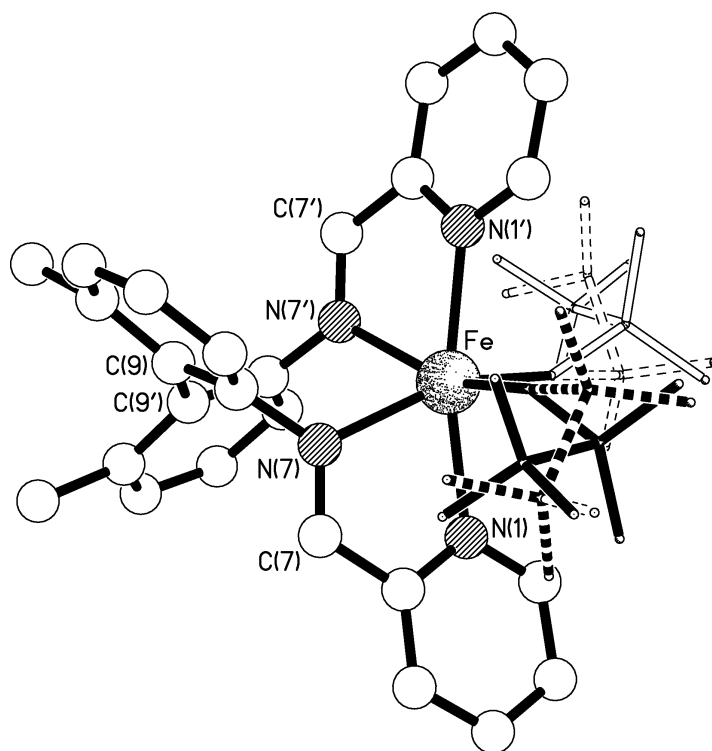

Fig. S2

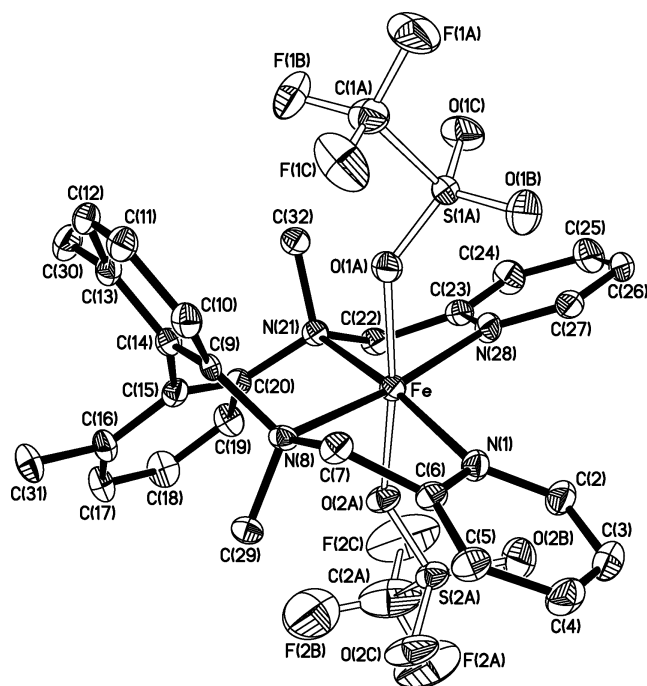

Fig. S3

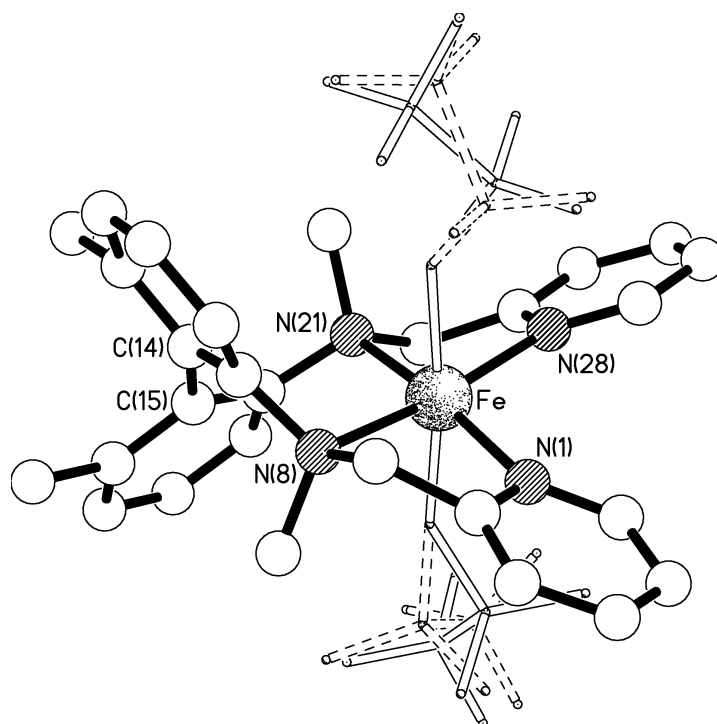

Fig. S4

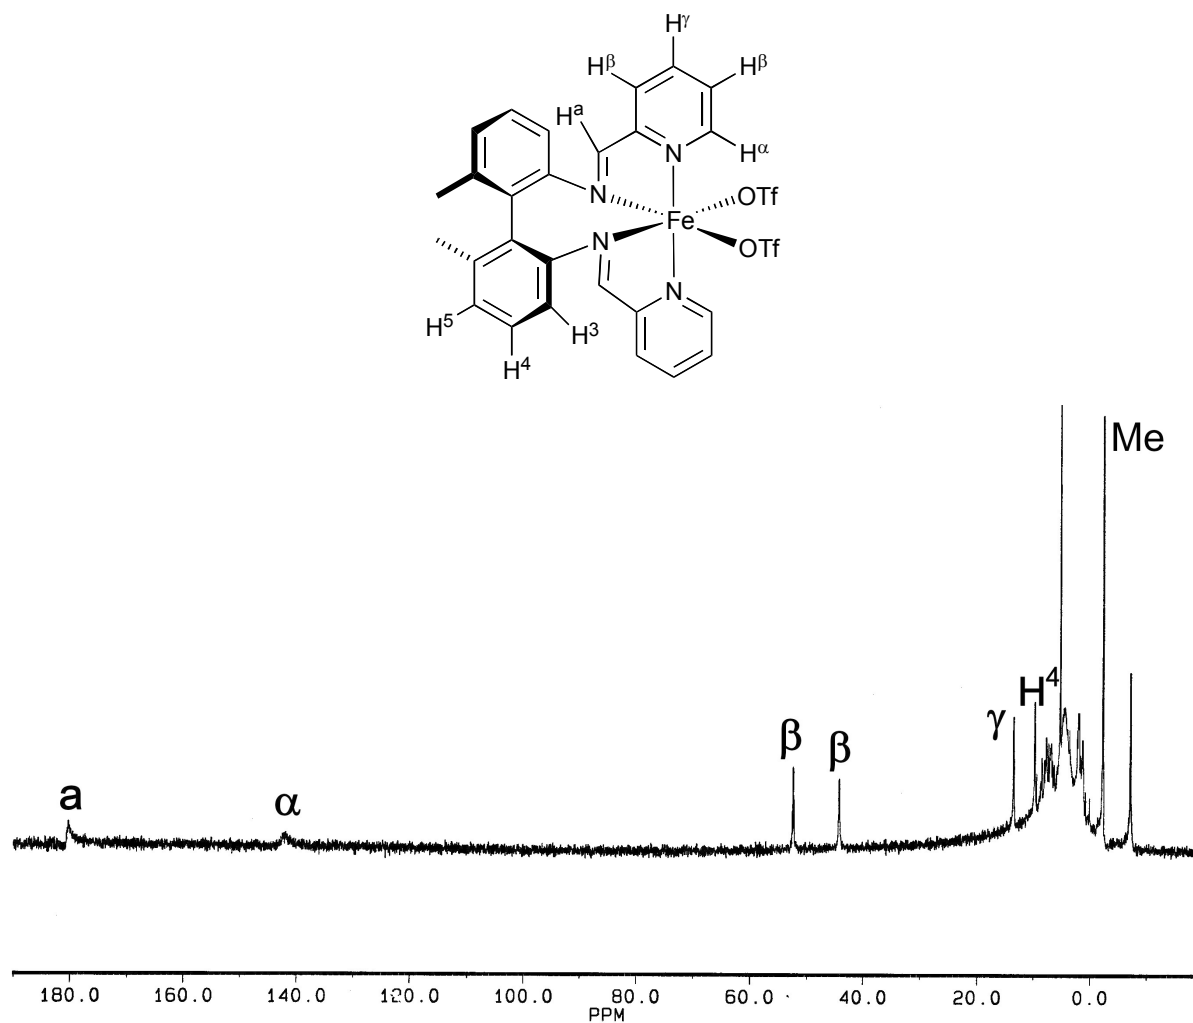

**Fig. S5.** The  $^1\text{H}$ -NMR spectrum and corresponding peak assignment for  $[\text{Fe}(\mathbf{1})(\text{OTf})_2]$ , recorded in  $\text{CD}_2\text{Cl}_2$  solution at 298 K.

George Britovsek -  $^1\text{H}$  COSY of Fe compd. at 400MHz. Wide sweep range.

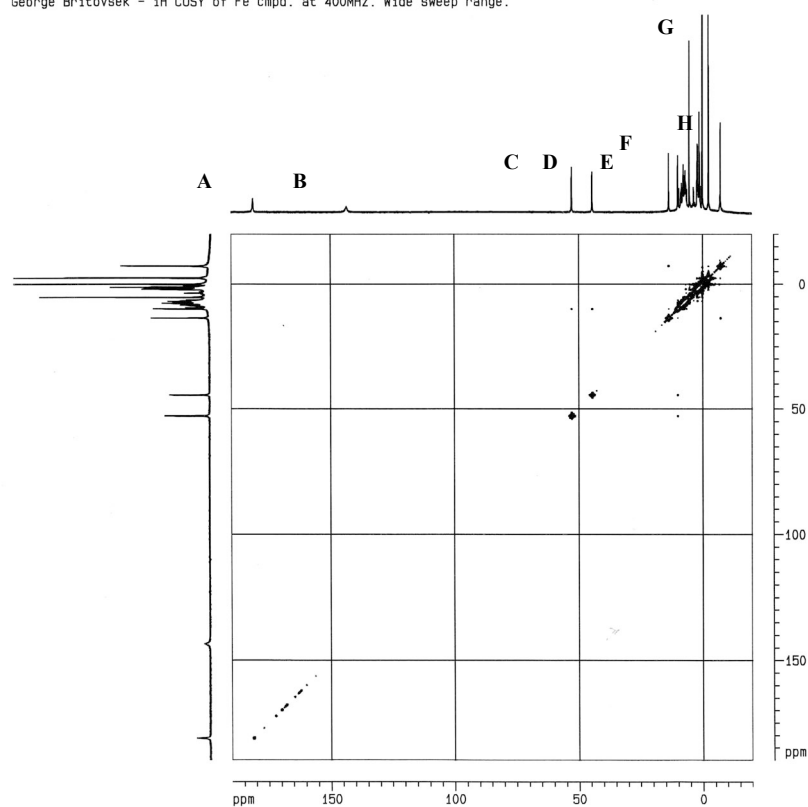

Fig. S6. The COSY  $^1\text{H}$ -NMR spectrum of  $[\text{Fe}(\mathbf{1})(\text{OTf})_2]$  in  $\text{CD}_2\text{Cl}_2$ .

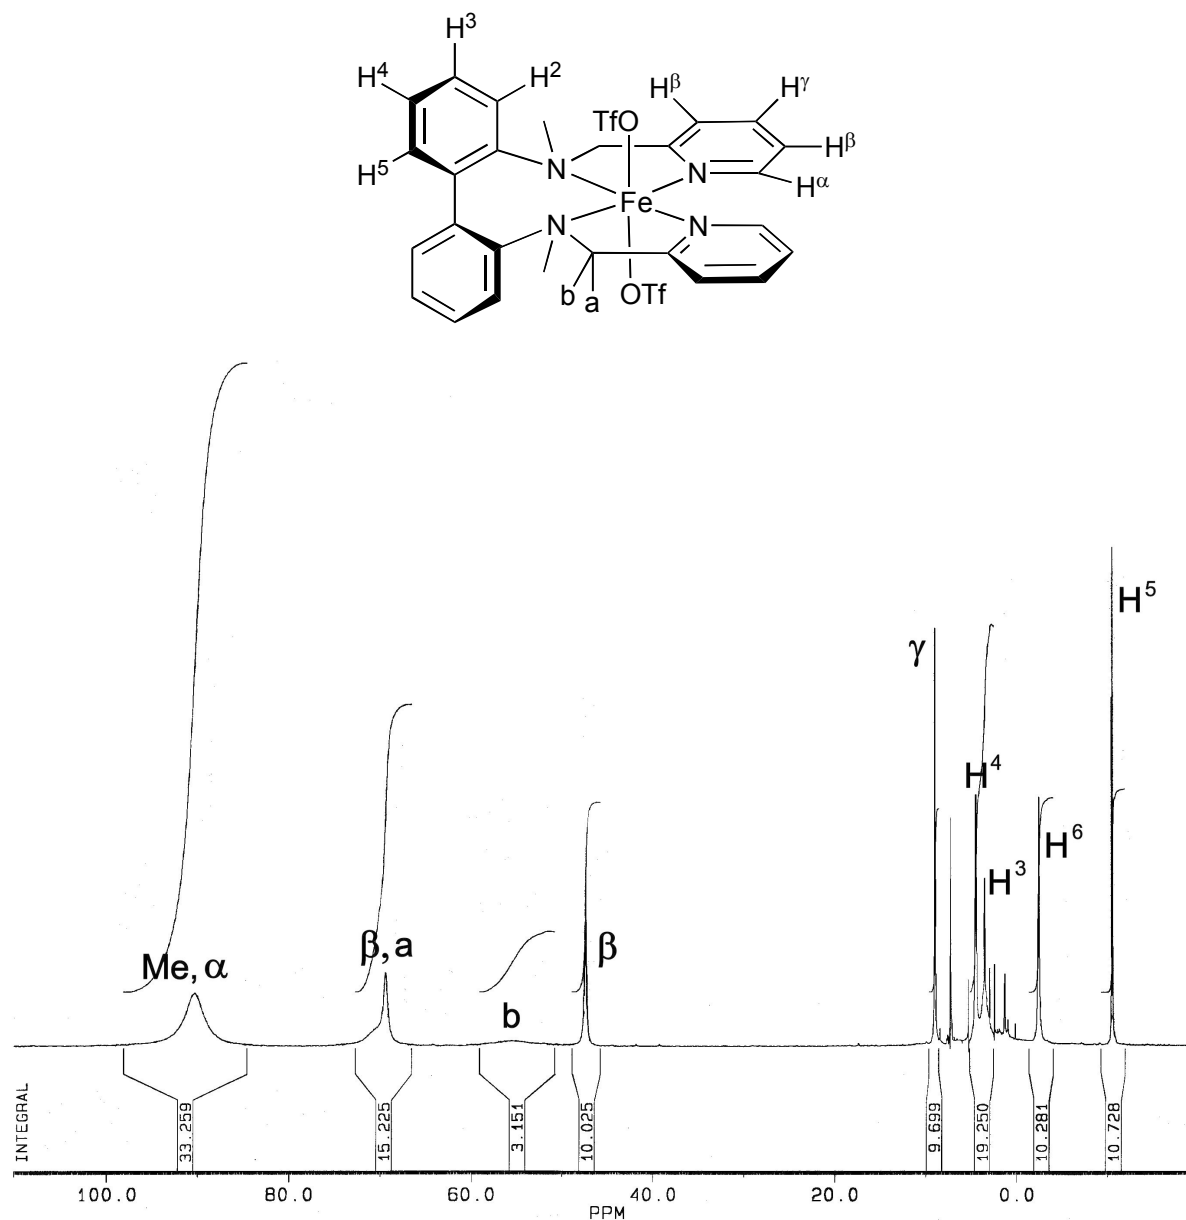

**Fig. S7.** The  $^1\text{H}$ -NMR spectrum and corresponding peak assignment for  $[\text{Fe}(\mathbf{7})(\text{OTf})_2]$  recorded in  $\text{CDCl}_3$  solution at 298 K.

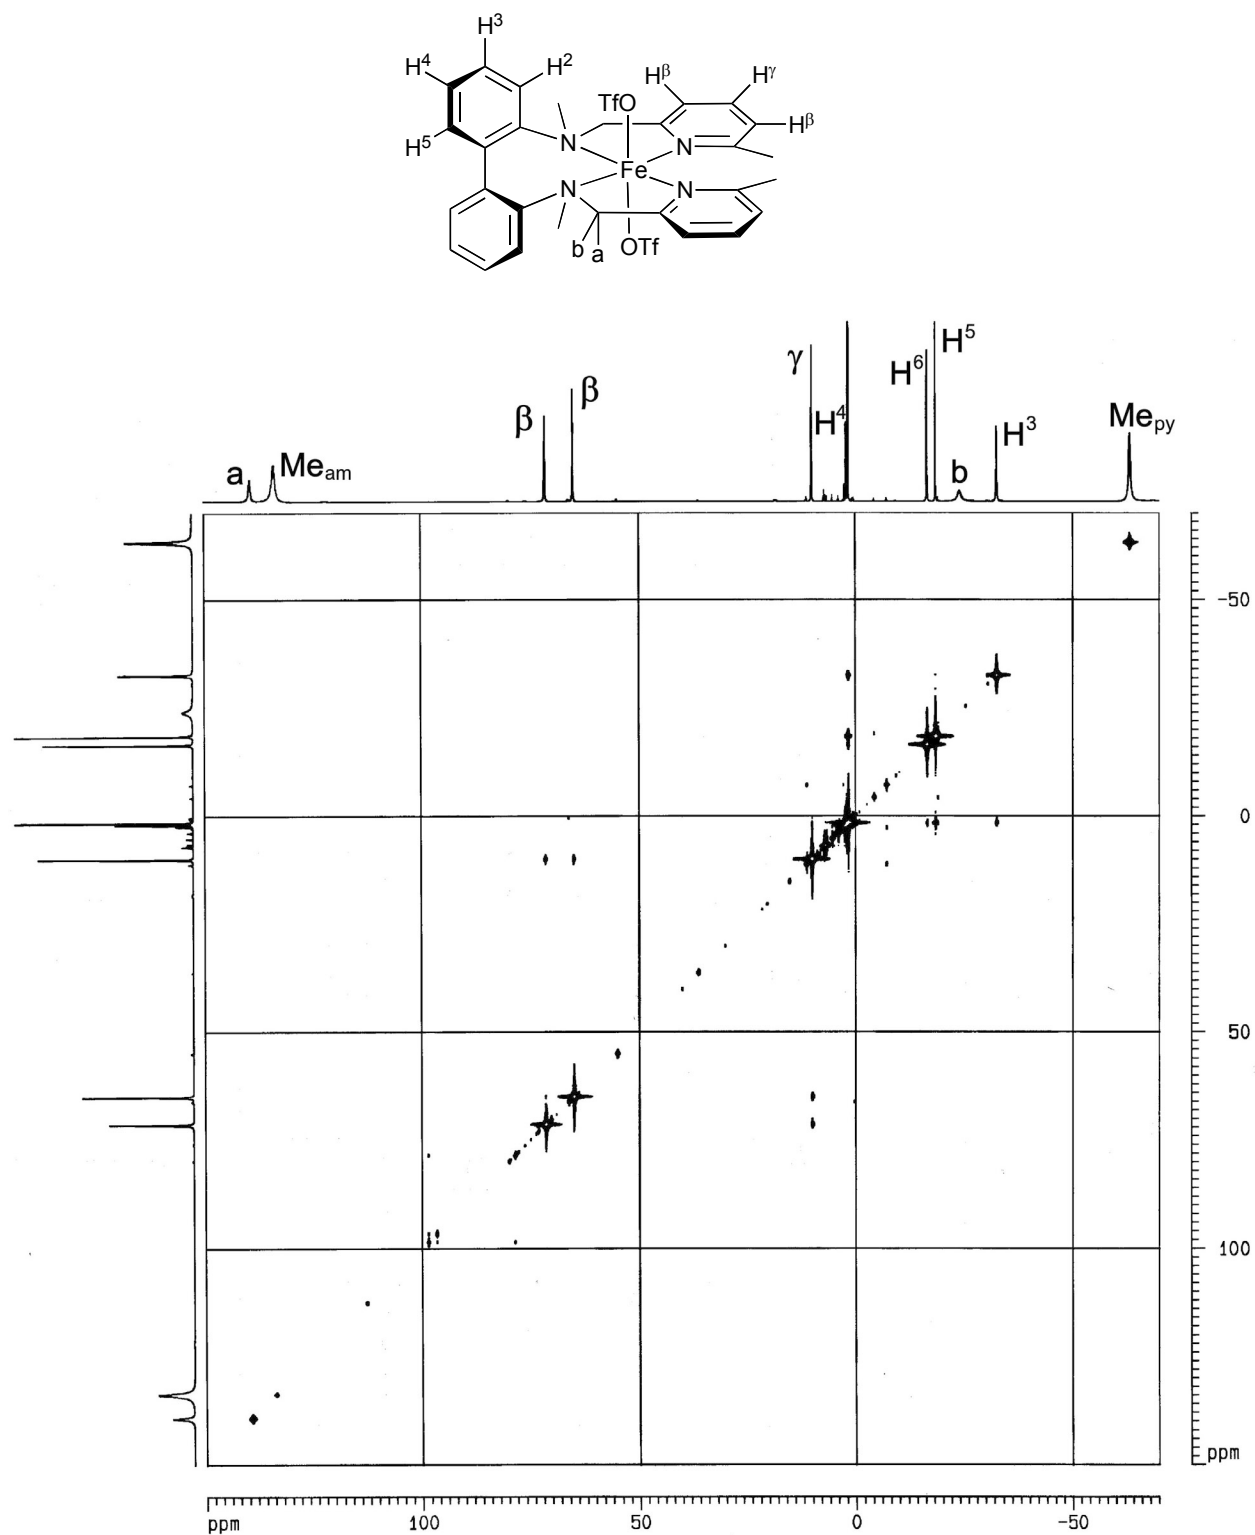

**Fig. S8.** The <sup>1</sup>H-NMR COSY spectrum and corresponding peak assignment for [Fe(8)(OTf)<sub>2</sub>] recorded in CD<sub>3</sub>CN solution at 298 K.

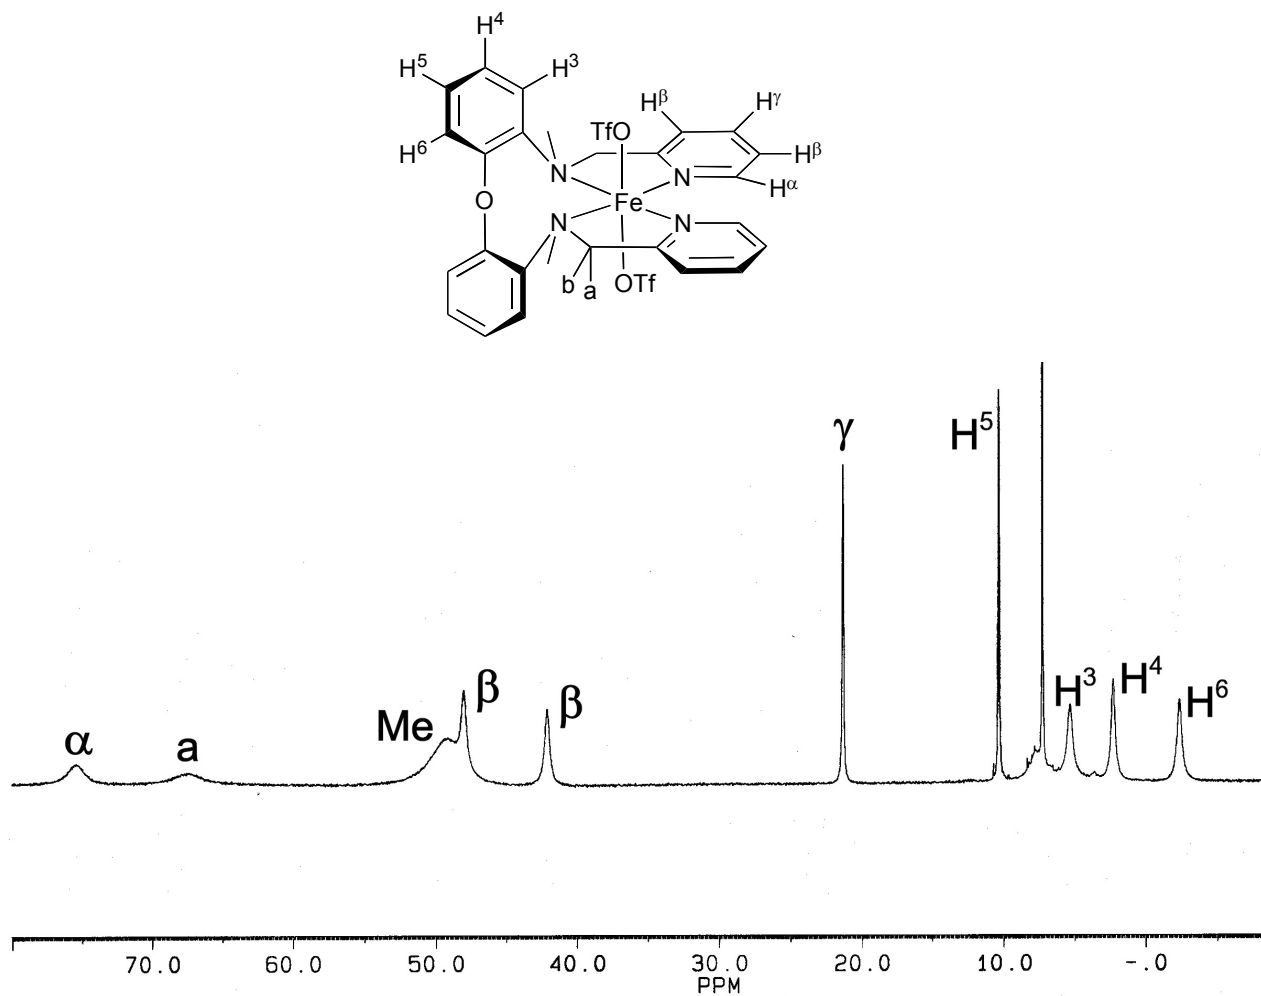

**Fig. S9.** The  $^1\text{H}$ -NMR spectrum and corresponding peak assignment for  $[\text{Fe}(\mathbf{12})(\text{OTf})_2]$ , recorded in  $\text{CDCl}_3$  solution at 298 K.

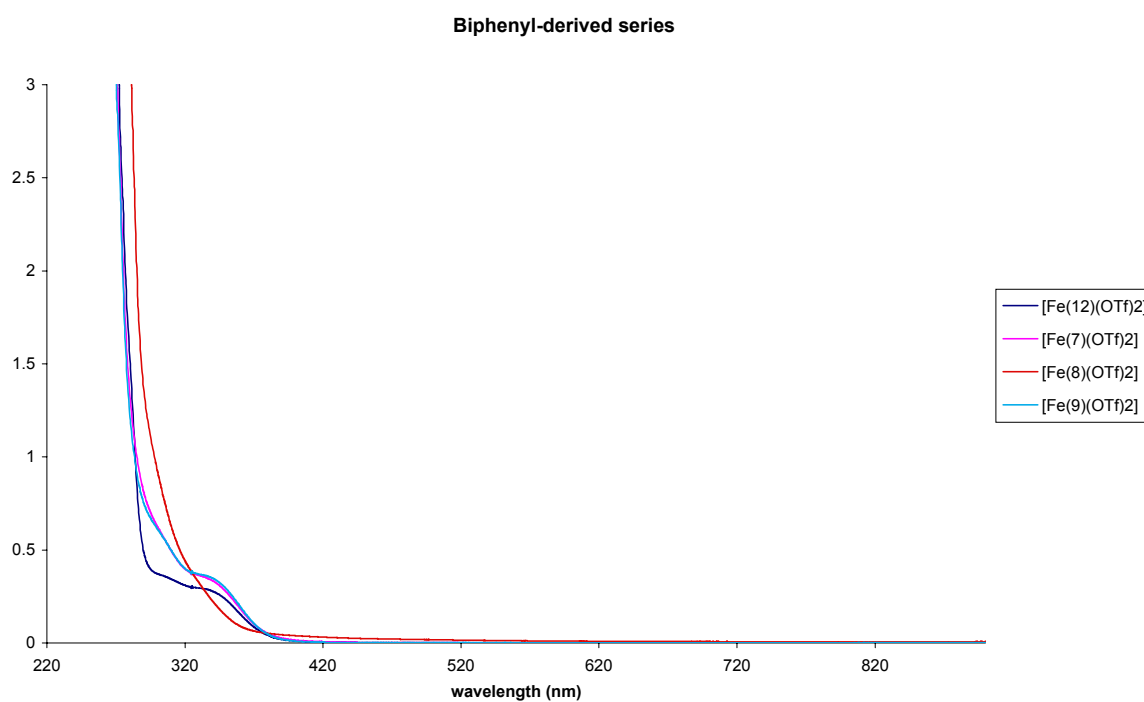

**Fig. S10.** UV-VIS spectra of biphenyl-bridged bis(pyridylmethyl) diamine iron(II) complexes. (Solvent: acetonitrile,  $c = 0.5$  mM).
